# Supplementary material for: Room-Temperature Solution-Processed 0D/1D Bilayer Electrodes for Translucent CsPbBr3 Perovskite Photovoltaics
Source: MDPI journal article supplement (doi:10.3390/nano11061489), 2021-06-04
Supplement: s1 [file s1]

# Room Temperature Solution Processed 0D/1D Bilayer Electrodes for translucent CsPbBr<sub>3</sub> Perovskite Photovoltaics

Bhaskar Parida<sup>1</sup>, Saemon Yoon<sup>1</sup> and Dong-Won Kang<sup>1,\*</sup>

<sup>1</sup> School of Energy Systems Engineering, Chung-Ang University, Seoul 06974, Republic of Korea.

\* Correspondence: kangdwnl@cau.ac.kr; Tel.: +82-2-820-5414

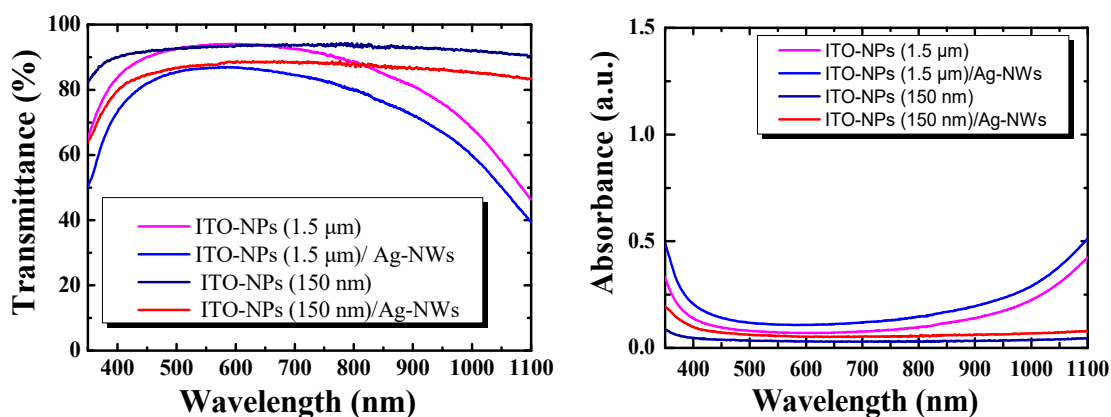

**Figure S1.** The optical transmittance and absorption of the ITO-NPs, ITO-NPs/Ag-NWs samples with different thickness in ITO-NPs (150 nm and 1.5 μm)

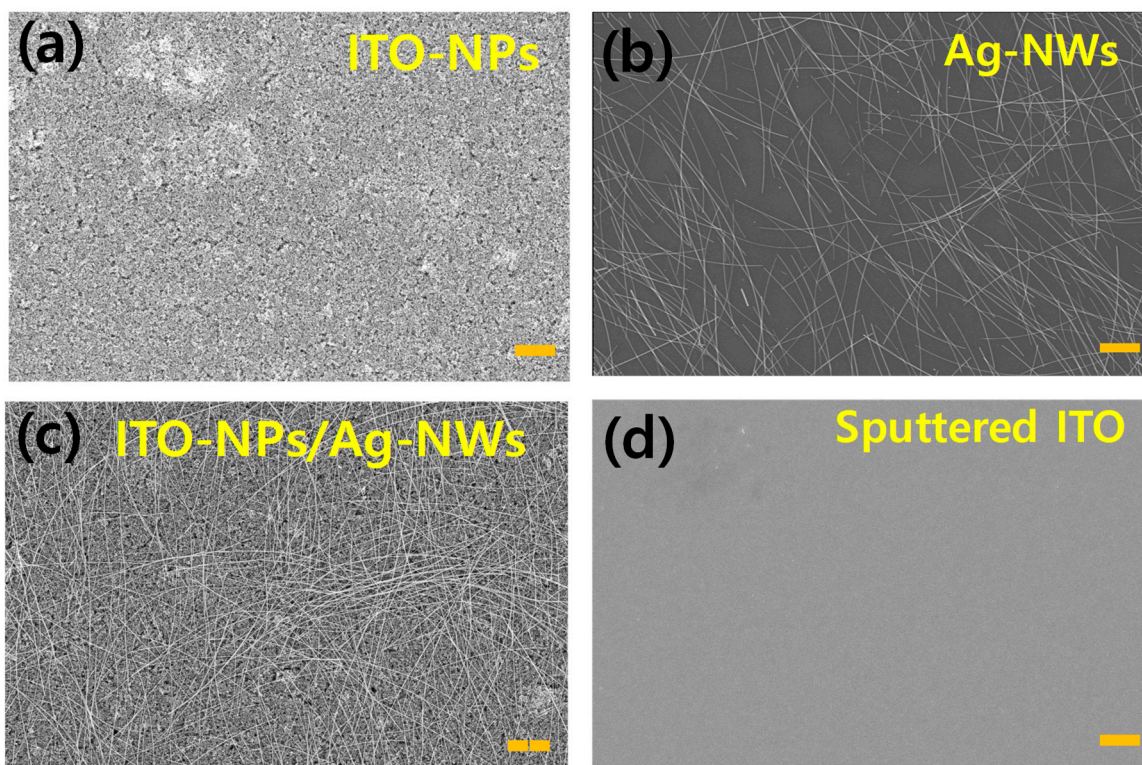

**Figure S2.** Field enhanced scanning electron microscope (FE-SEM) top view images of ITO-NPs, Ag-NWs, ITO-NPs/Ag-NWs bilayer, and sputtered ITO films (2  $\mu\text{m}$  in scale bar).

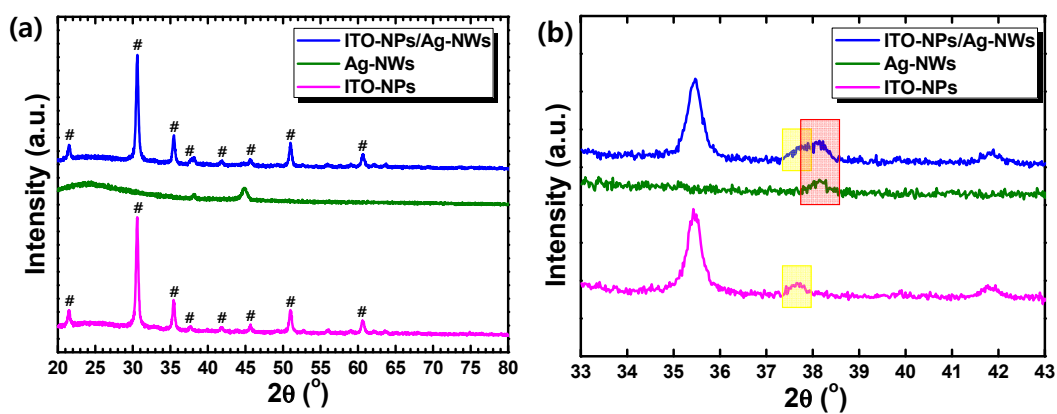

**Figure S3.** (a) XRD patterns for comparison of ITO diffraction peaks (symbol : #) and (b) the enlarged comparison of ITO-NPs (yellow rectangle) and Ag-NWs (red rectangle) diffraction peaks with ITO-NPs, Ag-NWs and ITO-NPs/Ag-NWs films.

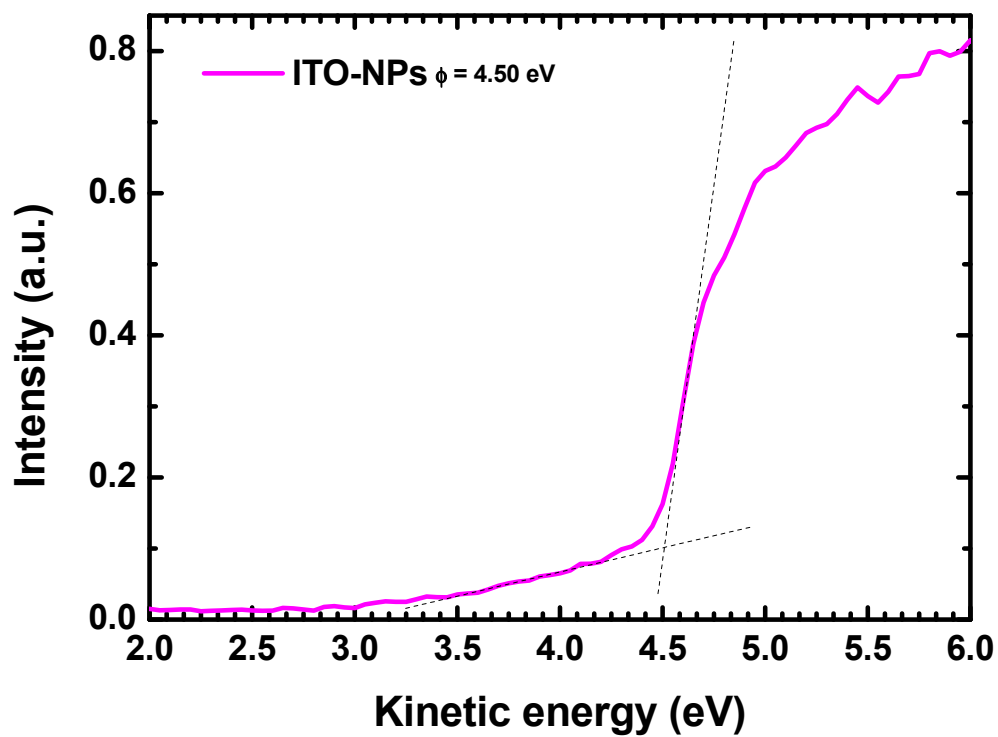

Figure S4. UPS spectra of ITO-NPs films.

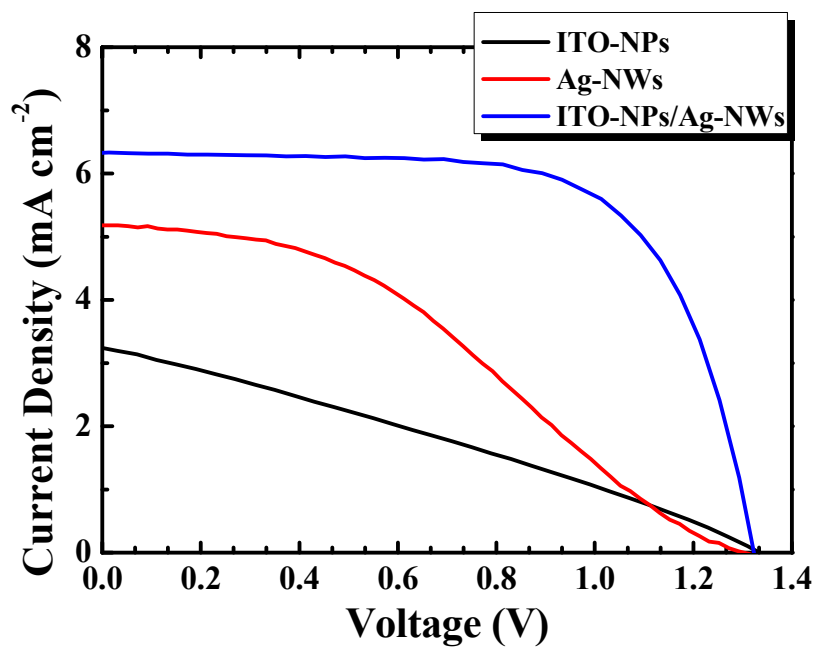

Figure S5. J-V properties of fabricated CsPbBr<sub>3</sub> perovskite solar cells with various solution-processed TEs.

**Table S1.** Device performance of fabricated CsPbBr<sub>3</sub> perovskite solar cells with various solution-processed TEs.

| Electrodes     | V <sub>oc</sub><br>(V) | J <sub>sc</sub><br>(mA cm <sup>-2</sup> ) | FF    | PCE (%) |
|----------------|------------------------|-------------------------------------------|-------|---------|
| ITO-NPs        | 1.33                   | 3.20                                      | 0.299 | 1.27    |
| Ag-NWs         | 1.29                   | 5.18                                      | 0.370 | 2.48    |
| ITO-NPs/Ag-NWs | 1.32                   | 6.33                                      | 0.677 | 5.64    |

**Table S2.** The detail PV parameters with statistical data for fabricated CsPbBr<sub>3</sub> solar cells with various rear electrode were included.

| Electrodes                | V <sub>oc</sub> (V) | J <sub>sc</sub><br>(mA cm <sup>-2</sup> ) | FF                | PCE (%)         |
|---------------------------|---------------------|-------------------------------------------|-------------------|-----------------|
| Au (Opaque)               | 1.29<br>(±0.04)     | 6.84<br>(±0.35)                           | 0.697<br>(±0.031) | 6.16<br>(±0.43) |
| ITO (Vacuum)              | 0.82<br>(±0.22)     | 6.19<br>(±0.25)                           | 0.421<br>(±0.100) | 2.26<br>(±1.01) |
| ITO-NPs/Ag-NWs (Solution) | 1.30<br>(±0.03)     | 6.19<br>(±0.27)                           | 0.627<br>(±0.044) | 5.06<br>(±0.39) |
